# Supplementary material
Source: PubMed Central journal article supplement (PMC3001004)

# **Aurora B interaction of centrosomal Nlp regulates cytokinesis**

**Jie Yan<sup>1</sup>, Shunqian Jin<sup>1,2</sup>, Jia Li<sup>1</sup>, and Qimin Zhan<sup>1\*</sup>**

## **Supplementary Data**

### **Supplementary Figure Legends**

Fig. S1. (A) Endogenous Nlp co-localized with Aurora B at midbody. Fixed MCF-7, HeLa and A549 cells were firstly probed with rabbit polyclonal anti-Nlp primary antibody and FITC-conjugated secondary antibody. Aurora B was directed with mouse monoclonal anti-Aurora B first antibody and TRITC-conjugated secondary antibody. DAPI was used to visualize nuclei. The result showed endogenous Nlp (green) and Aurora B (red) co-localized at the midbody of dividing cells (red arrow showed); white arrow showed the cells in interphase. Scale bar: 10 $\mu$ m. (B) In HCT116 cells, anti-Nlp and anti-Aurora B antibodies were used separately to do immunoprecipitation assay. Non-immunogenic rabbit IgG was used as negative control. HC means the heavy chain of IgG.

Fig. S2. Abnormal nuclear phenotypes in cells after endogenous Aurora B exhausted. HeLa over-expressing GFP-Nlp cells were treated with siAurora B for 24 hours, and then stained with DAPI to detect the nuclei. Different abnormal nuclear phenotypes were found through the laser-scanning confocal microscope. White arrows showed the special nuclear phenotypes.

Fig. S1

**A**

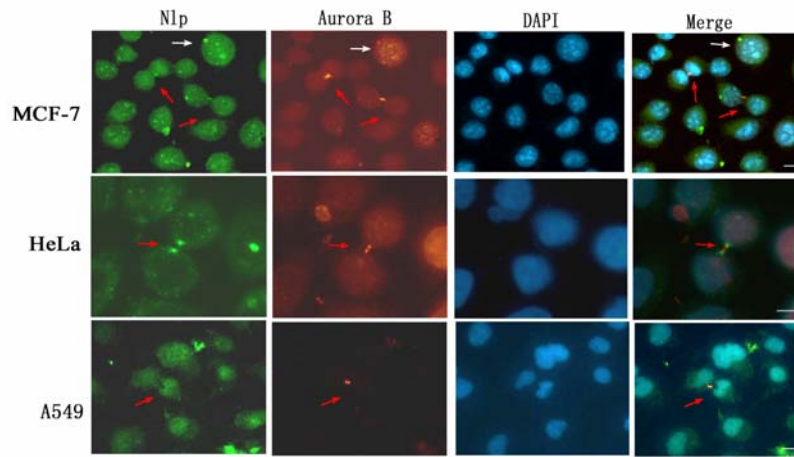

**B**

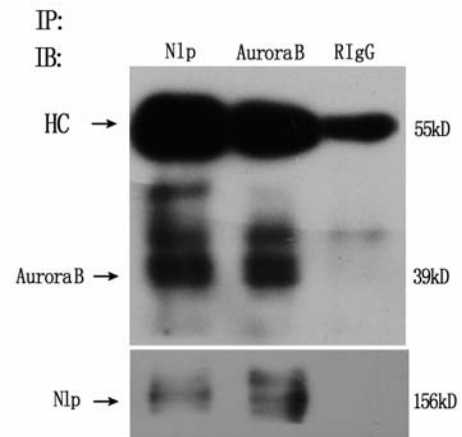

Fig. S2

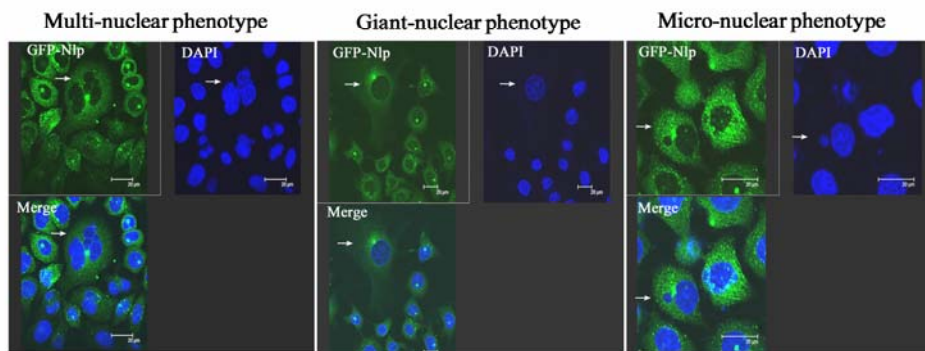

Supplement: supp_M110.140541_jbc.M110.140541-1.pdf [file supp_M110.140541_jbc.M110.140541-1.pdf]
